# Supplementary material
Source: PubMed Central journal article supplement (PMC3963523)
Supplement: NIHMS545968-supplement-Appendix.pdf [file NIHMS545968-supplement-Appendix.pdf]

**Appendix eFigure 1. Absolute Risks and Risk Differences for Outcomes in the Trials (Intervention Phase by Age Group)**

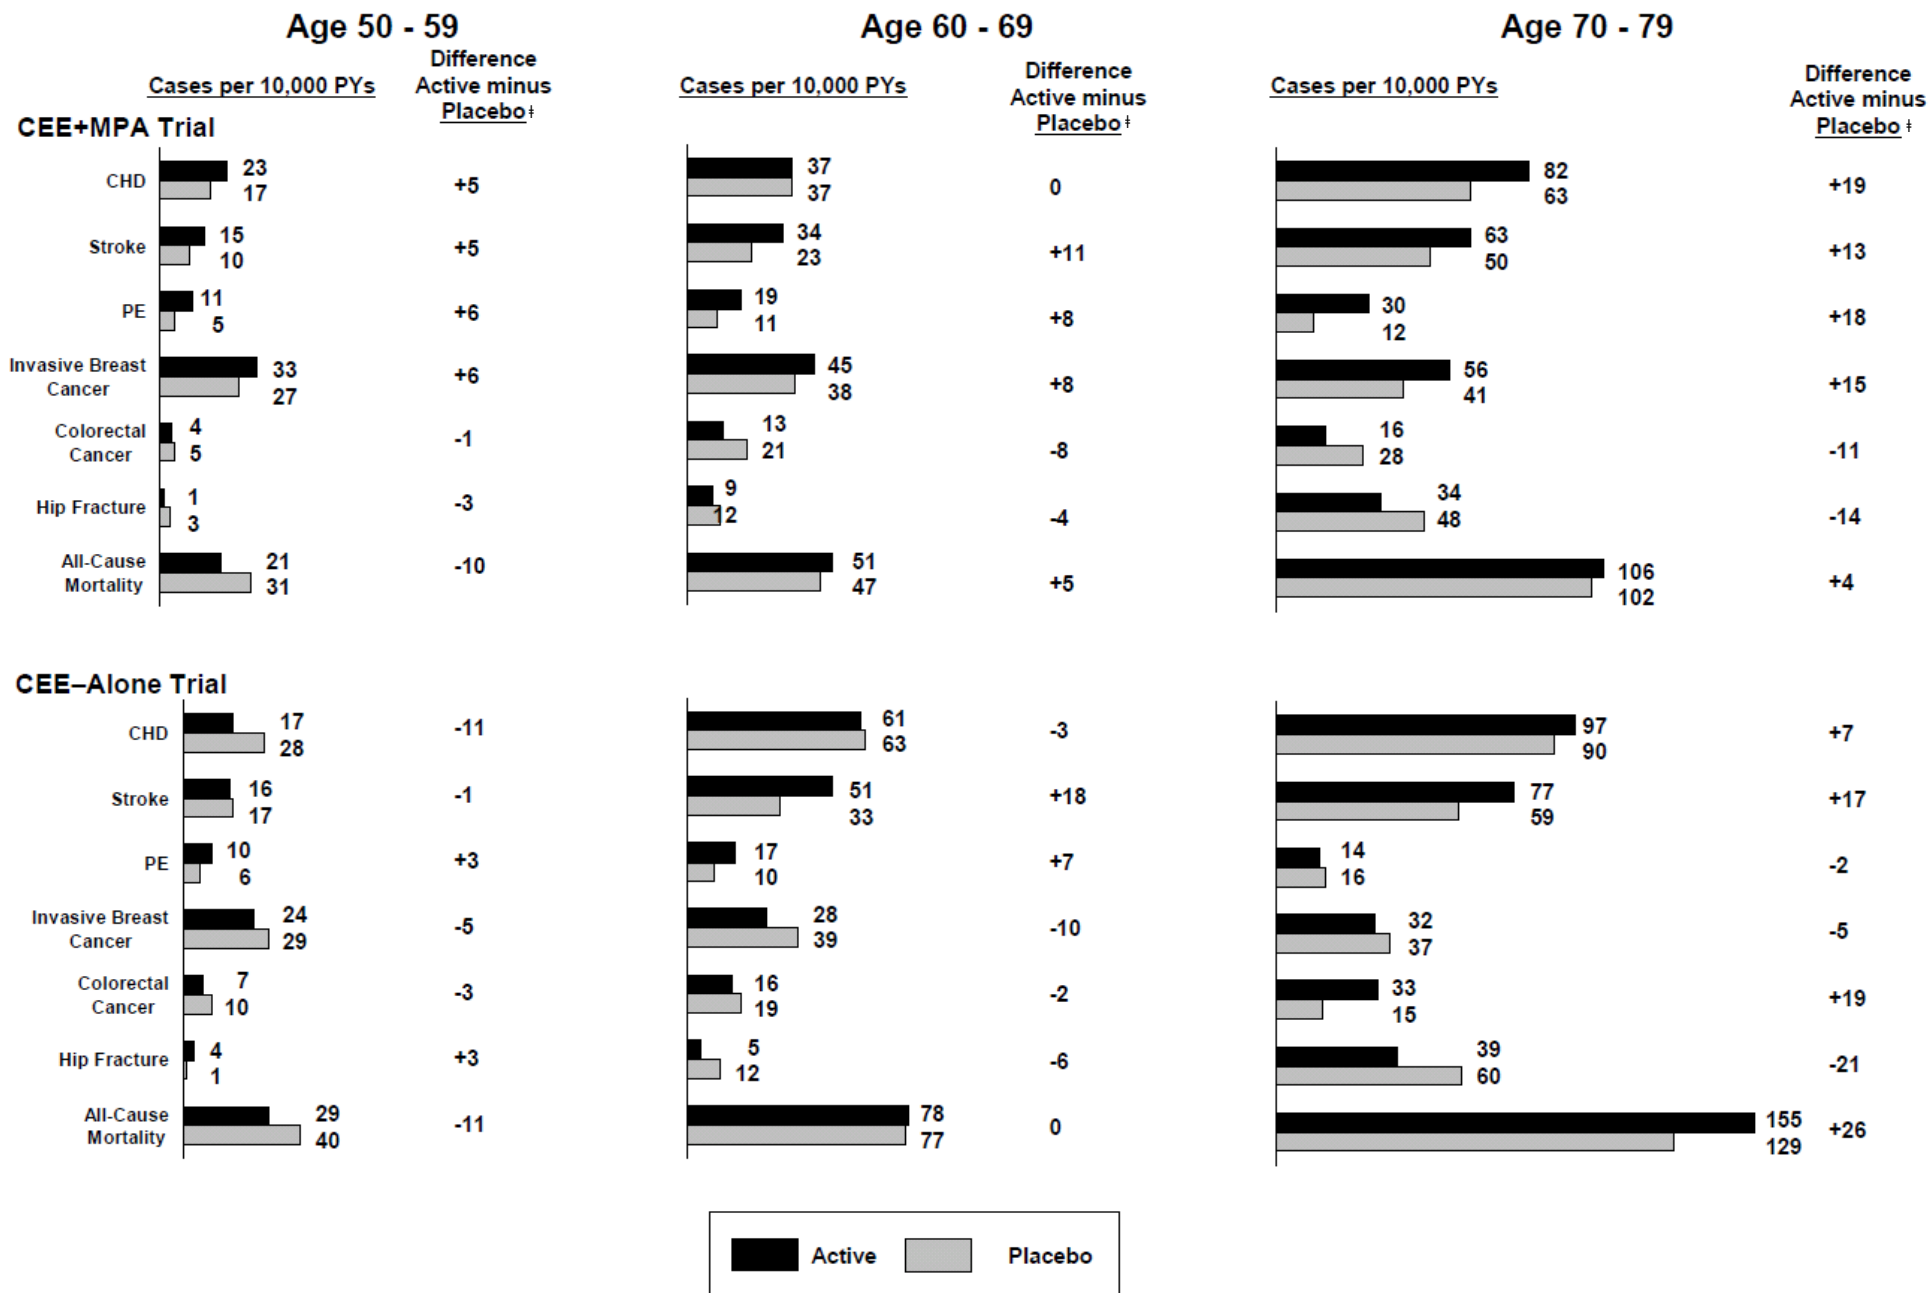

† Difference in estimated absolute excess risk (active minus placebo). Numbers may not add up precisely due to rounding error.

**Appendix eFigure 2. Absolute Risks and Hazard Ratios for Outcomes in the Trials (Intervention Phase by Time Since Menopause)**

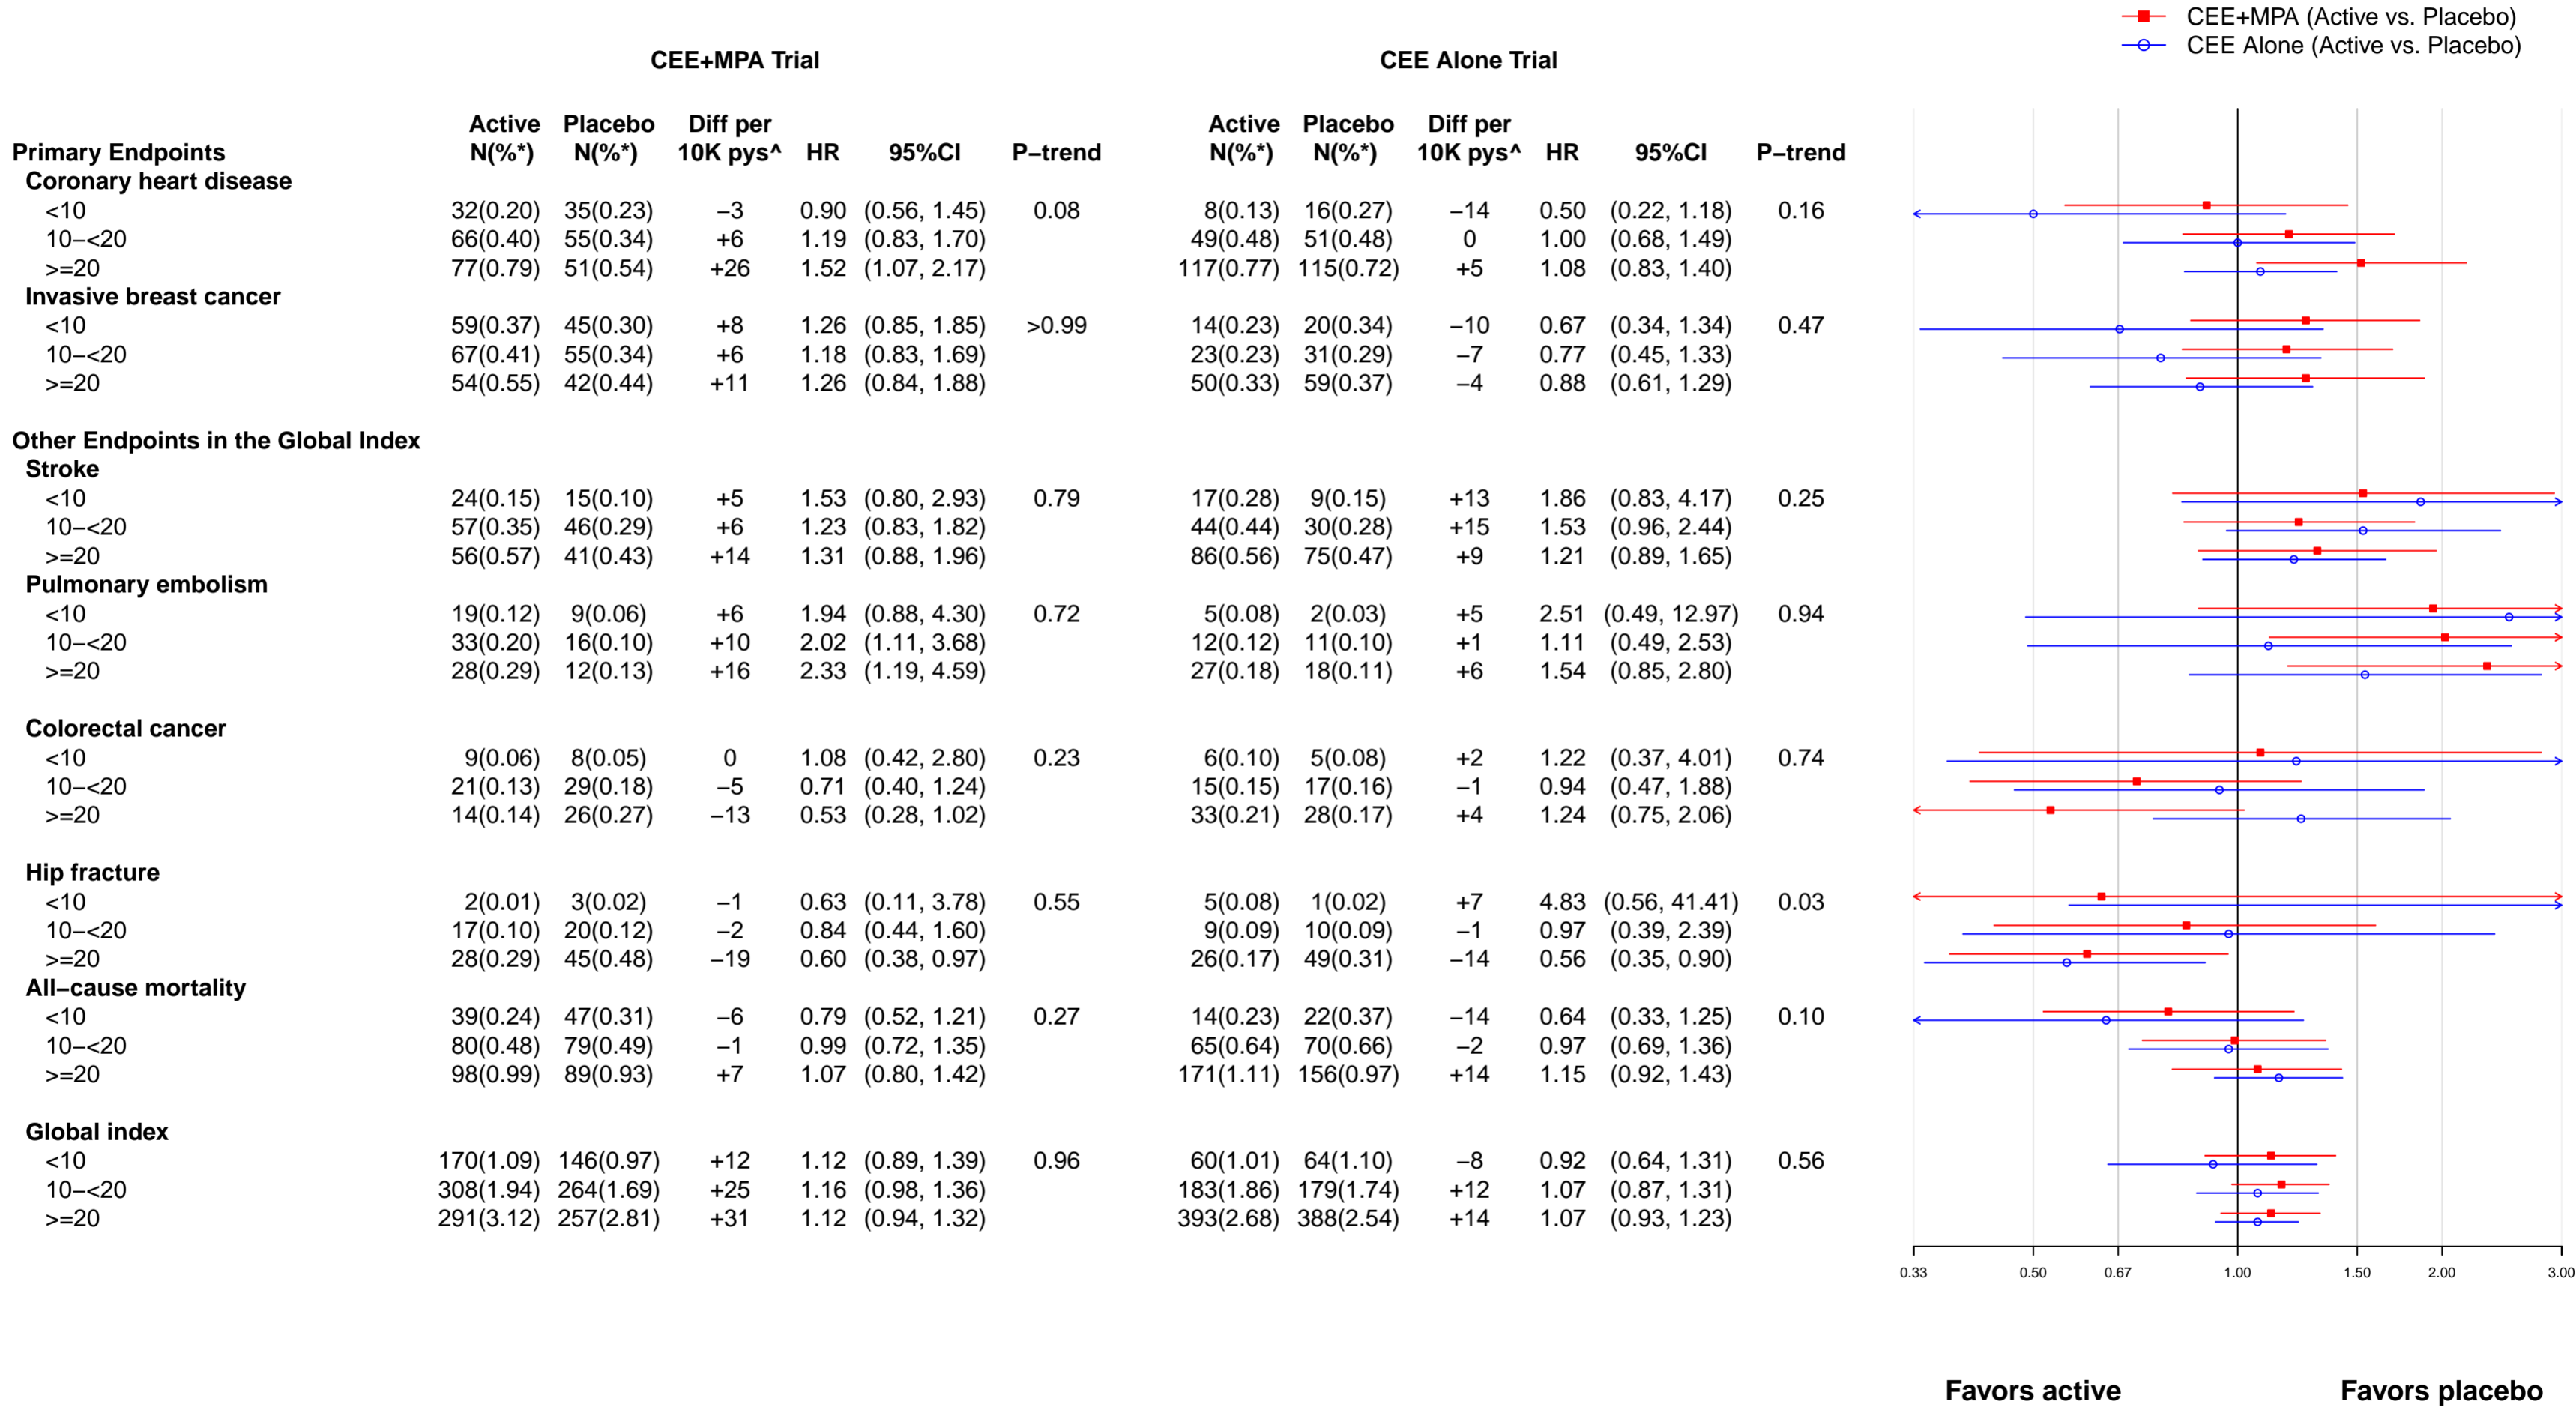

CEE indicates conjugated equine estrogens; and MPA, medroxyprogesterone acetate.

\* Annualized percentage

^Difference in estimated absolute excess risk (active minus placebo) per 10,000 person years. Numbers may not add up precisely due to rounding error.

### Appendix eFigure 3. Results for Other Health-Related Quality of Life Variables in the WHI Hormone Therapy Trials (Intervention Phase)

|                       | CEE+MPA Trial         |                        |        | CEE Alone Trial       |                        |        |
|-----------------------|-----------------------|------------------------|--------|-----------------------|------------------------|--------|
|                       | Active<br>Mean(95%CI) | Placebo<br>Mean(95%CI) | P-val  | Active<br>Mean(95%CI) | Placebo<br>Mean(95%CI) | P-val  |
| <b>RAND-36*</b>       |                       |                        |        |                       |                        |        |
| Physical functioning  | 82.6(82.3, 82.9)      | 81.8(81.5, 82.1)       | <0.001 | 76.0(75.5, 76.4)      | 75.4(75.0, 75.8)       | 0.08   |
| Role physical         | 77.4(76.7, 78.0)      | 76.2(75.5, 76.9)       | 0.02   | 69.0(68.0, 70.0)      | 68.9(68.0, 69.9)       | 0.91   |
| Bodily pain           | 77.6(77.2, 78.0)      | 75.6(75.2, 76.1)       | <0.001 | 69.8(69.2, 70.4)      | 69.1(68.5, 69.7)       | 0.10   |
| General health        | 76.6(76.3, 76.9)      | 76.1(75.8, 76.4)       | 0.02   | 72.2(71.8, 72.6)      | 72.2(71.9, 72.6)       | 0.87   |
| Vitality              | 65.2(64.9, 65.6)      | 64.9(64.6, 65.3)       | 0.22   | 60.9(60.5, 61.3)      | 61.1(60.7, 61.6)       | 0.45   |
| Social Functioning    | 89.9(89.5, 90.3)      | 90.0(89.6, 90.4)       | 0.80   | 85.8(85.3, 86.4)      | 86.9(86.3, 87.4)       | 0.01   |
| Role emotional        | 85.3(84.7, 85.9)      | 85.4(84.8, 86.0)       | 0.87   | 81.0(80.2, 81.8)      | 82.2(81.4, 83.0)       | 0.04   |
| Mental health         | 80.7(80.4, 80.9)      | 80.7(80.5, 81.0)       | 0.79   | 78.5(78.2, 78.9)      | 78.7(78.3, 79.0)       | 0.54   |
| <b>Other</b>          |                       |                        |        |                       |                        |        |
| Self-reported health^ | 2.27(2.26, 2.29)      | 2.29(2.28, 2.31)       | 0.06   | 2.53(2.51, 2.55)      | 2.54(2.52, 2.55)       | 0.56   |
| Sleep disturbance#    | 6.13(6.05, 6.20)      | 6.51(6.44, 6.59)       | <0.001 | 6.92(6.81, 7.02)      | 7.25(7.15, 7.36)       | <0.001 |
| Depressive symptoms@  | 2.21(2.16, 2.26)      | 2.25(2.20, 2.30)       | 0.25   | 2.58(2.51, 2.65)      | 2.66(2.59, 2.73)       | 0.09   |

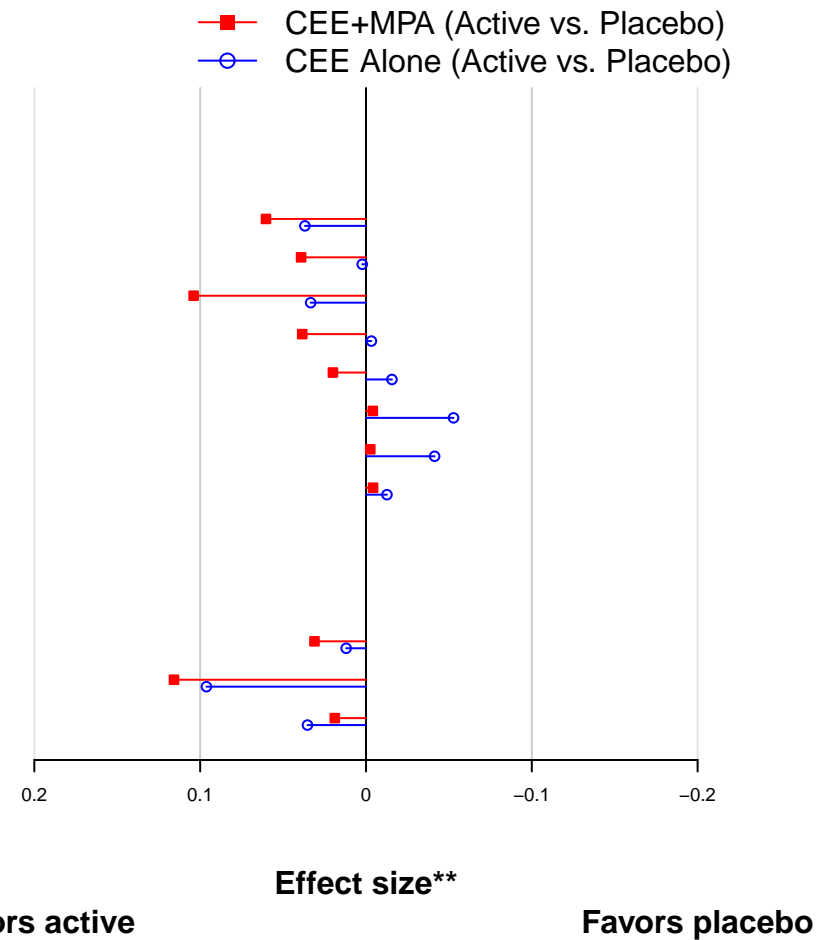

CEE indicates conjugated equine estrogens; and MPA, medroxyprogesterone acetate.

\* Scored from 0 (worst) to 100 (best).

^ Scored from 1 (best) to 5 (worst).

# Scored from 0 (best) to 20 (worst).

@ Scored from 0 (best) to 18 (worst).

\*\* Estimated Mean Difference at Year 1, adjusting for baseline, divided by the root-mean-square error. For all measures, the sign of the effect size has been flipped (if necessary) so that adverse effects (favors placebo) extend to the right and favorable effects (favors active) extend to the left.

**Appendix eFigure 4. Results Among Women in the Trials with No Prior HT Use (Intervention Phase by Age Group)**

|                                            | CEE+MPA Trial |               |                   |      |               |         | CEE Alone Trial |               |                   |      |               |         |
|--------------------------------------------|---------------|---------------|-------------------|------|---------------|---------|-----------------|---------------|-------------------|------|---------------|---------|
|                                            | Active N(%*)  | Placebo N(%*) | Diff per 10K pys^ | HR   | 95%CI         | P-trend | Active N(%*)    | Placebo N(%*) | Diff per 10K pys^ | HR   | 95%CI         | P-trend |
| <b>Primary Endpoints</b>                   |               |               |                   |      |               |         |                 |               |                   |      |               |         |
| <b>Coronary heart disease</b>              |               |               |                   |      |               |         |                 |               |                   |      |               |         |
| 50–59                                      | 25(0.21)      | 17(0.15)      | +6                | 1.46 | (0.79, 2.71)  | 0.50    | 12(0.19)        | 23(0.37)      | –18               | 0.52 | (0.26, 1.04)  | 0.96    |
| 60–69                                      | 59(0.36)      | 60(0.40)      | –4                | 0.89 | (0.62, 1.28)  |         | 59(0.69)        | 69(0.81)      | –13               | 0.82 | (0.58, 1.17)  |         |
| 70–79                                      | 59(0.83)      | 49(0.71)      | +12               | 1.22 | (0.84, 1.79)  |         | 43(0.95)        | 46(0.99)      | –4                | 0.95 | (0.63, 1.44)  |         |
| <b>Invasive breast cancer</b>              |               |               |                   |      |               |         |                 |               |                   |      |               |         |
| 50–59                                      | 39(0.33)      | 35(0.31)      | +2                | 1.06 | (0.67, 1.67)  | 0.81    | 15(0.24)        | 24(0.39)      | –15               | 0.62 | (0.32, 1.18)  | 0.98    |
| 60–69                                      | 70(0.43)      | 61(0.41)      | +2                | 1.05 | (0.74, 1.48)  |         | 24(0.28)        | 36(0.42)      | –14               | 0.66 | (0.39, 1.10)  |         |
| 70–79                                      | 36(0.50)      | 29(0.42)      | +9                | 1.19 | (0.73, 1.95)  |         | 13(0.28)        | 21(0.45)      | –17               | 0.63 | (0.32, 1.26)  |         |
| <b>Other Endpoints in the Global Index</b> |               |               |                   |      |               |         |                 |               |                   |      |               |         |
| <b>Stroke</b>                              |               |               |                   |      |               |         |                 |               |                   |      |               |         |
| 50–59                                      | 17(0.14)      | 14(0.12)      | +2                | 1.15 | (0.57, 2.34)  | 0.83    | 11(0.18)        | 8(0.13)       | +5                | 1.45 | (0.57, 3.67)  | 0.69    |
| 60–69                                      | 58(0.36)      | 30(0.20)      | +16               | 1.78 | (1.14, 2.78)  |         | 44(0.51)        | 30(0.35)      | +16               | 1.46 | (0.92, 2.33)  |         |
| 70–79                                      | 44(0.62)      | 38(0.55)      | +7                | 1.13 | (0.73, 1.75)  |         | 34(0.75)        | 24(0.51)      | +23               | 1.45 | (0.86, 2.45)  |         |
| <b>Pulmonary embolism</b>                  |               |               |                   |      |               |         |                 |               |                   |      |               |         |
| 50–59                                      | 16(0.14)      | 4(0.04)       | +10               | 3.77 | (1.26, 11.29) | 0.07    | 3(0.05)         | 5(0.08)       | –3                | 0.59 | (0.14, 2.49)  | 0.34    |
| 60–69                                      | 33(0.20)      | 13(0.09)      | +12               | 2.35 | (1.24, 4.47)  |         | 12(0.14)        | 11(0.13)      | +1                | 1.09 | (0.48, 2.47)  |         |
| 70–79                                      | 18(0.25)      | 7(0.10)       | +15               | 2.48 | (1.03, 5.93)  |         | 5(0.11)         | 7(0.15)       | –4                | 0.68 | (0.22, 2.15)  |         |
| <b>Colorectal cancer</b>                   |               |               |                   |      |               |         |                 |               |                   |      |               |         |
| 50–59                                      | 6(0.05)       | 5(0.04)       | +1                | 1.15 | (0.35, 3.78)  | 0.71    | 5(0.08)         | 8(0.13)       | –5                | 0.62 | (0.20, 1.90)  | 0.70    |
| 60–69                                      | 23(0.14)      | 34(0.23)      | –9                | 0.62 | (0.36, 1.05)  |         | 15(0.17)        | 15(0.17)      | 0                 | 1.00 | (0.49, 2.06)  |         |
| 70–79                                      | 13(0.18)      | 19(0.27)      | –9                | 0.66 | (0.32, 1.33)  |         | 14(0.30)        | 8(0.17)       | +13               | 1.78 | (0.75, 4.25)  |         |
| <b>Hip fracture</b>                        |               |               |                   |      |               |         |                 |               |                   |      |               |         |
| 50–59                                      | 1(0.01)       | 4(0.04)       | –3                | 0.21 | (0.02, 1.93)  | 0.87    | 1(0.02)         | 1(0.02)       | 0                 | 0.98 | (0.06, 15.67) | 0.23    |
| 60–69                                      | 16(0.10)      | 18(0.12)      | –2                | 0.81 | (0.41, 1.59)  |         | 7(0.08)         | 10(0.12)      | –4                | 0.71 | (0.27, 1.87)  |         |
| 70–79                                      | 29(0.41)      | 34(0.49)      | –9                | 0.82 | (0.50, 1.35)  |         | 22(0.48)        | 27(0.58)      | –10               | 0.83 | (0.47, 1.45)  |         |
| <b>All-cause mortality</b>                 |               |               |                   |      |               |         |                 |               |                   |      |               |         |
| 50–59                                      | 28(0.24)      | 30(0.26)      | –3                | 0.89 | (0.53, 1.48)  | 0.14    | 16(0.26)        | 28(0.45)      | –19               | 0.56 | (0.30, 1.04)  | 0.73    |
| 60–69                                      | 85(0.52)      | 70(0.46)      | +5                | 1.08 | (0.79, 1.49)  |         | 76(0.87)        | 76(0.88)      | –1                | 1.00 | (0.73, 1.38)  |         |
| 70–79                                      | 77(1.07)      | 73(1.04)      | +3                | 1.02 | (0.74, 1.40)  |         | 66(1.42)        | 67(1.42)      | 0                 | 1.01 | (0.72, 1.41)  |         |
| <b>Global index</b>                        |               |               |                   |      |               |         |                 |               |                   |      |               |         |
| 50–59                                      | 125(1.08)     | 103(0.92)     | +16               | 1.16 | (0.89, 1.51)  | 0.58    | 57(0.93)        | 80(1.33)      | –40               | 0.71 | (0.50, 0.99)  | 0.49    |
| 60–69                                      | 304(1.93)     | 249(1.70)     | +22               | 1.12 | (0.94, 1.32)  |         | 188(2.27)       | 200(2.45)     | –18               | 0.91 | (0.75, 1.11)  |         |
| 70–79                                      | 229(3.37)     | 204(3.07)     | +30               | 1.09 | (0.90, 1.32)  |         | 159(3.69)       | 149(3.35)     | +34               | 1.10 | (0.88, 1.38)  |         |

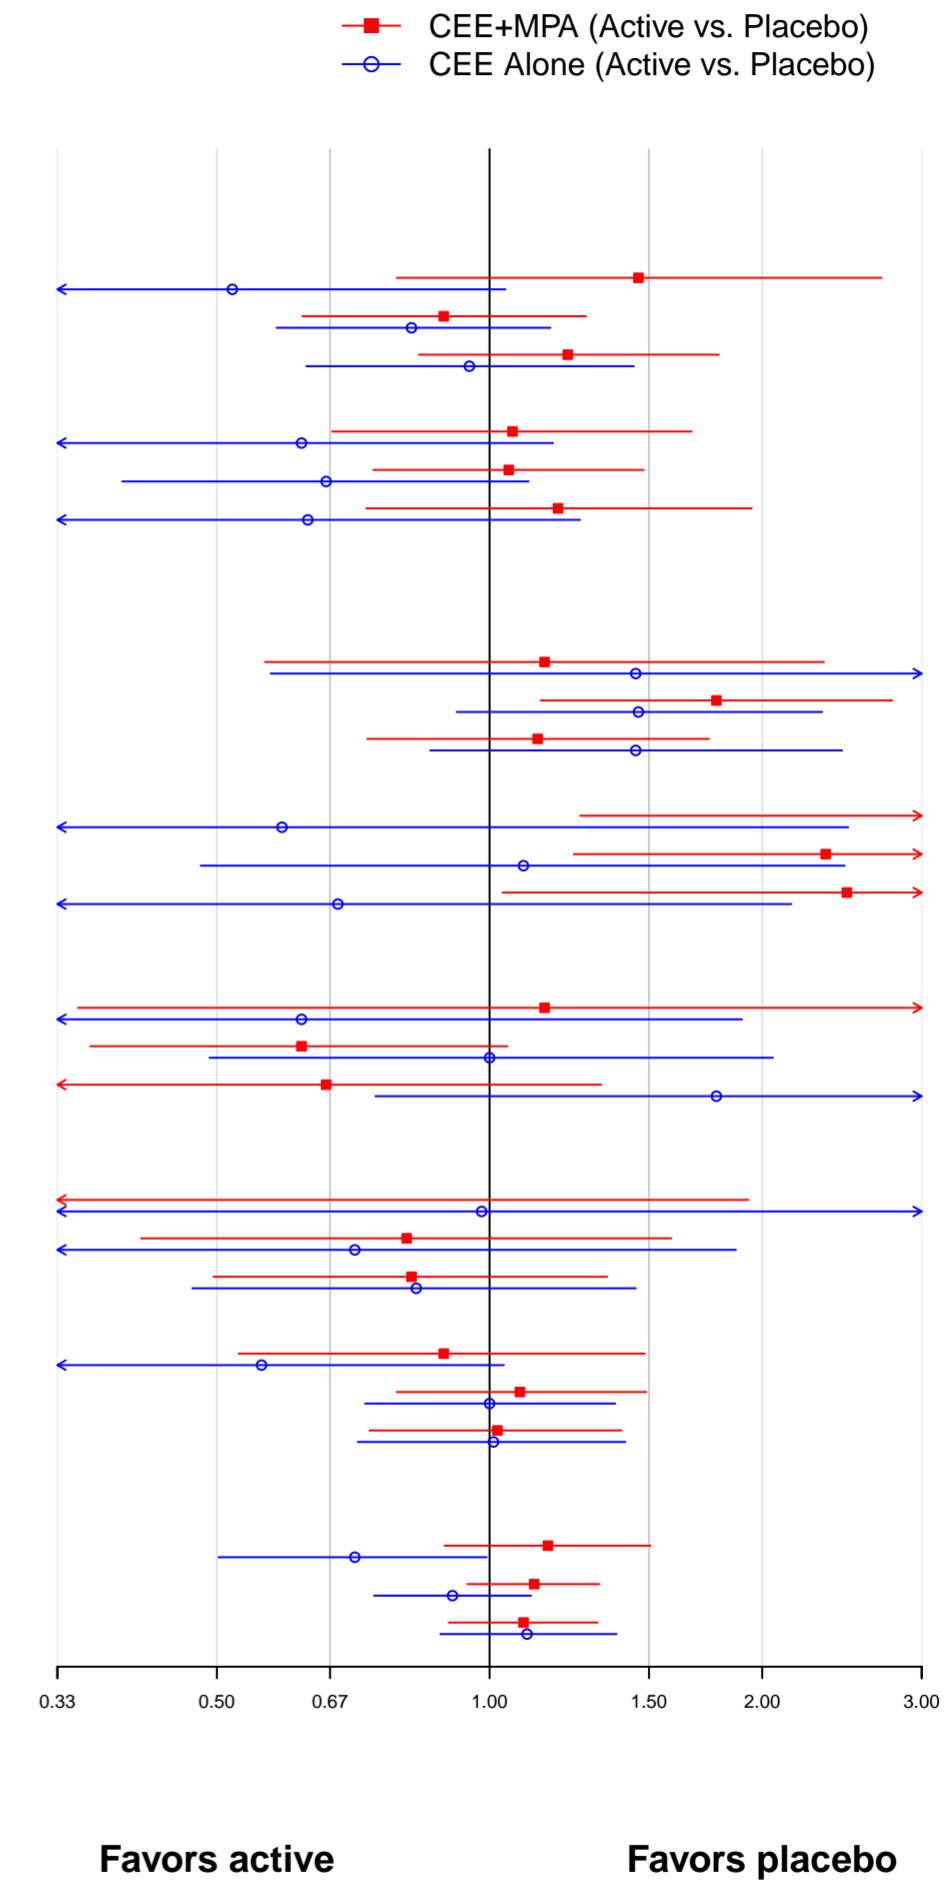

CEE indicates conjugated equine estrogens; and MPA, medroxyprogesterone acetate.

^ Difference in estimated absolute excess risk (active minus placebo) per 10,000 person years. Numbers may not add up precisely due to rounding error.

\* Three-way trend test between randomization assignment, age group, and prior HT use

**Appendix eFigure 5. CHD Results Among Women in the Trials (Intervention Phase, According to Vasomotor Symptoms and Age Group)**

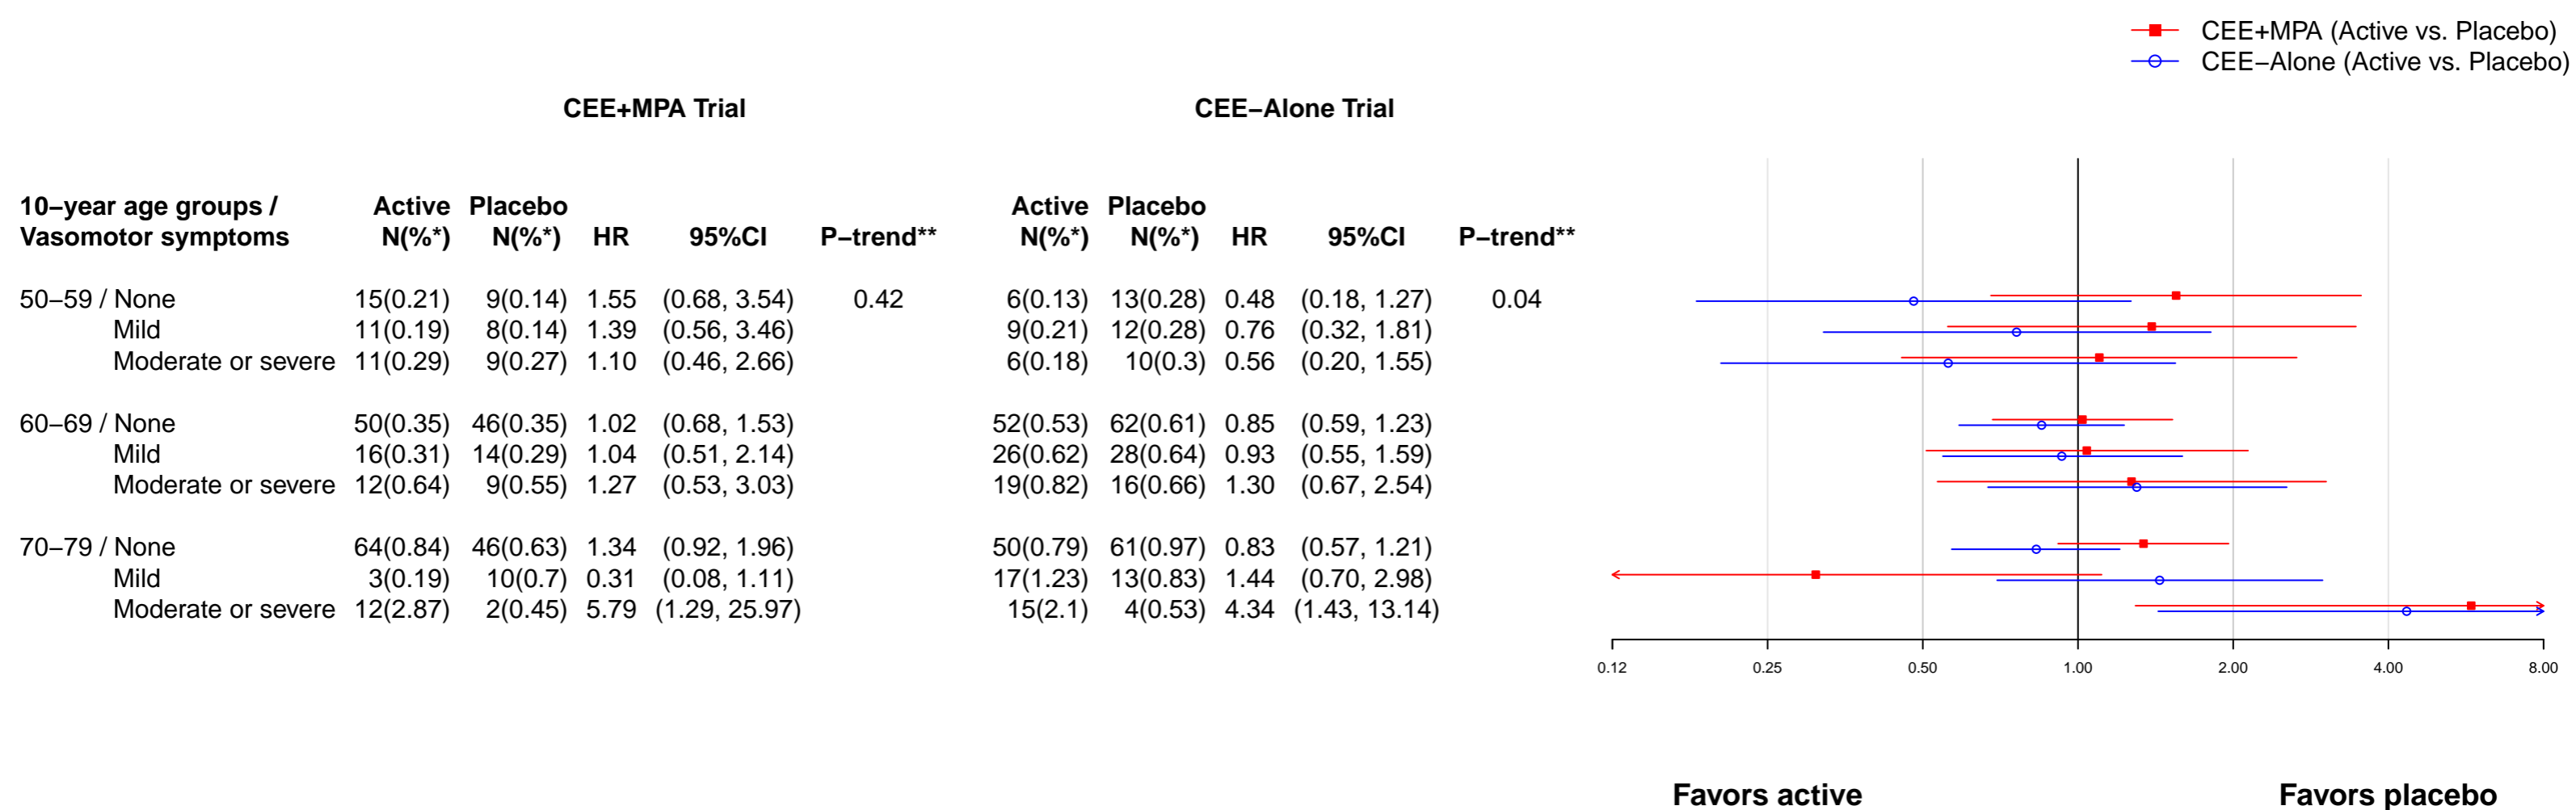

CEE indicates conjugated equine estrogens; and MPA, medroxyprogesterone acetate.

\* Annualized percentage

\*\* Three-way trend test between randomization assignment, age group, and vasomotor symptoms
