# Supplementary material
Source: PubMed Central journal article supplement (PMC3963523)
Supplement: NIHMS545968-supplement-Supplementary_online_appendix.pdf [file NIHMS545968-supplement-Supplementary_online_appendix.pdf]

## **APPENDIX (SUPPLEMENTAL ONLINE MATERIALS)**

### **Secondary and Patient-Reported Outcomes in the Two Trials**

**Other symptoms and health-related quality of life outcomes:** Several other symptoms have been examined in the WHI HT trials and results have been previously reported. Changes in menopausal symptoms and treatment-related effects were analyzed after 1 year (estrogen-progestin<sup>1</sup> and estrogen alone<sup>2</sup>), at trial closure (treatment-compliant women in the estrogen-alone trial<sup>2</sup>), and after stopping HT (treatment-compliant women in the estrogen-progestin<sup>3</sup> and estrogen-alone trials<sup>2</sup>). In addition to the effects on vasomotor symptoms and other endpoints reported in the main text, CEE+MPA provided significantly greater relief than placebo at 1 year for vaginal or genital dryness (74.1 v. 54.6%; RR=2.40 [1.90-3.02]), joint pain or stiffness (47.1 v. 38.4%; RR=1.43 [1.24-1.64]), and general aches or pains (49.3 v. 43.7%; RR=1.25 [1.08-1.44]). However, it also raised the risk for vaginal or genital discharge (4.1 v. 1.0%; RR=4.47 [3.44-5.81]), vaginal or genital irritation (4.2 v. 2.8%; RR=1.52 [1.27-1.81]), headaches (5.8 v. 4.7%; RR=1.26 [1.08-1.46]), and breast tenderness (9.3 v. 2.4%; RR=4.26 [3.59-5.04]). Vaginal bleeding, mostly spotting, was commonly reported in the estrogen-progestin trial, occurring in 51% of women in the treatment group at month 6 and declining to 13% at year 5. Among women in the placebo group, 86.6% never reported bleeding. CEE+MPA also increased the risk for hysterectomy (3.1% v. 2.5%; RR=1.26 [1.03-1.48]) and dilation and curettage procedures (5.4 v. 2.4%; RR=2.23 [1.88-2.63]).

At 1 year, CEE alone, compared with placebo, improved vaginal dryness (34.3 v. 42.9%; RR=0.80 [0.68-0.93]), but increased the risk for breast tenderness (8.4 v. 3.4%; RR=2.48 [2.08-2.97]) CEE alone was also associated with a small but significant ( $p=0.04$ ) reduction in joint pain in an analysis that combined women with and without joint pain at baseline. Assignment to CEE alone was associated with a reduced risk for knee or hip replacement by the end of the intervention period (RR=0.84 [0.70-1.00];  $p=0.05$ ),<sup>4</sup> suggesting a favorable influence on joint health. Such a reduction was not seen for CEE+MPA.<sup>4</sup>

Among a subgroup of nondisabled participants aged  $\geq 65$  who completed performance-based assessments of physical function (grip strength, chair stands, and timed walk) at baseline and at 1, 3, and 6 years, neither CEE+MPA nor CEE alone reduced the risk for decline in physical function.<sup>5</sup>

### **Additional Analyses Addressing Risk Stratification**

A detailed presentation of biomarker findings and analyses stratified by baseline risk factor status and other clinical characteristics is beyond the scope of this manuscript. However, three sets of analyses are highlighted in this section due to their potential relevance to clinical decision making about HT. Women with more favorable baseline CHD risk factor status (lower LDL-cholesterol levels, lower ratios of total cholesterol:HDL-C, and absence of metabolic syndrome criteria) tended to have more favorable CHD outcomes on HT than women at higher baseline risk of CHD.<sup>6-9</sup> For breast cancer, women closer to the onset of menopause or with shorter gap times (interval between menopause and start of HT use) tended to have higher breast cancer risk on estrogen-progestin than women with longer gaps times.<sup>10</sup> Finally, because some clinicians prescribe HT for fracture prevention, analyses stratifying women by their baseline risk of fracture (low, moderate, and high) were conducted, to assess the global index for each group. No group had a favorable global index in either trial (HRs were 1.20, 1.23, and 1.03, respectively, for CEE+MPA and 0.81, 1.09, 1.04, respectively, for CEE alone), indicating that the benefit in reducing fracture risk was offset or exceeded by other risks associated with HT, even among women at the highest risk for fracture.<sup>11, 12</sup>

### **Additional Discussion of the Breast Cancer Findings**

Breast cancer results differed between the two trials. Women on CEE+MPA had more abnormal mammograms and required more breast biopsies.<sup>13</sup> CEE+MPA interfered with breast cancer detection,<sup>13</sup> increased breast

cancer incidence, with cancers diagnosed at a more advanced stage, likely reflecting diagnostic delay.<sup>14</sup> As women closer to menopause may have higher risk with estrogen plus progestin use,<sup>10, 15-17</sup> the slightly elevated HRs seen with CEE+MPA in WHI may underestimate breast cancer in this group. In addition, deaths from breast cancer were significantly increased after 11 years of follow-up.<sup>14, 18</sup> Analyses adjusting for time from menopause, mammography patterns, and prior HT use before enrollment can reconcile many of the discrepancies between observational and clinical trial findings for breast cancer.<sup>15</sup> While the post-intervention findings for CEE+MPA on breast cancer show some persistent elevation in risk, the year-to-year reductions in HRs after stopping suggests possible influence of a carry over effect due to reduced diagnostic interference on mammography once HT ended. In contrast to the findings with CEE+MPA, the significant reduction in breast cancer seen with CEE was unexpected.<sup>19,20</sup> Further study of the relationship between different HT regimens and breast cancer is warranted.

## **APPENDIX References:**

1. Barnabei VM, Cochrane BB, Aragaki AK, et al. Menopausal symptoms and treatment-related effects of estrogen and progestin in the Women's Health Initiative. *Obstet Gynecol.* May 2005;105(5 Pt 1):1063-1073.
2. Brunner RL, Aragaki A, Barnabei V, et al. Menopausal symptom experience before and after stopping estrogen therapy in the Women's Health Initiative randomized, placebo-controlled trial. *Menopause.* Sep-Oct 2010;17(5):946-954.
3. Ockene JK, Barad DH, Cochrane BB, et al. Symptom experience after discontinuing use of estrogen plus progestin. *JAMA.* Jul 13 2005;294(2):183-193.
4. Cirillo DJ, Wallace RB, Wu L, Yood RA. Effect of hormone therapy on risk of hip and knee joint replacement in the Women's Health Initiative. *Arthritis Rheum.* Oct 2006;54(10):3194-3204.
5. Michael YL, Gold R, Manson JE, et al. Hormone therapy and physical function change among older women in the Women's Health Initiative: a randomized controlled trial. *Menopause.* Mar 2010;17(2):295-302.
6. Bray PF, Larson JC, Lacroix AZ, et al. Usefulness of baseline lipids and C-reactive protein in women receiving menopausal hormone therapy as predictors of treatment-related coronary events. *Am J Cardiol.* Jun 1 2008;101(11):1599-1605.
7. Manson JE, Hsia J, Johnson KC, et al. Estrogen plus progestin and the risk of coronary heart disease. *N Engl J Med.* Aug 7 2003;349(6):523-534.
8. Wild RA, Wu C, Curb D, et al. Coronary heart disease events in the Women's Health Initiative hormone trials: effect modification by metabolic syndrome: A nested case-control study within the Women's Health Initiative randomized clinical trials. *Menopause.* 2013;20.
9. Rossouw JE, Prentice RL, Manson JE, et al. Relationships of coronary heart disease with 27-hydroxycholesterol, low-density lipoprotein cholesterol, and menopausal hormone therapy. *Circulation.* Sep 25 2012;126(13):1577-1586.
10. Prentice RL, Chlebowski RT, Stefanick ML, et al. Estrogen plus progestin therapy and breast cancer in recently postmenopausal women. *Am J Epidemiol.* May 15 2008;167(10):1207-1216.
11. Cauley JA, Robbins J, Chen Z, et al. Effects of estrogen plus progestin on risk of fracture and bone mineral density: the Women's Health Initiative randomized trial. *JAMA.* Oct 1 2003;290(13):1729-1738.
12. Jackson RD, Wactawski-Wende J, LaCroix AZ, et al. Effects of conjugated equine estrogen on risk of fractures and BMD in postmenopausal women with hysterectomy: results from the women's health initiative randomized trial. *J Bone Miner Res.* Jun 2006;21(6):817-828.
13. Chlebowski RT, Anderson G, Pettinger M, et al. Estrogen plus progestin and breast cancer detection by means of mammography and breast biopsy. *Arch Intern Med.* Feb 25 2008;168(4):370-377; quiz 345.
14. Chlebowski RT, Anderson GL. Changing concepts: Menopausal hormone therapy and breast cancer. *J Natl Cancer Inst.* Apr 4 2012;104(7):517-527.

15. Chlebowski RT, Manson JE, Anderson GL, et al. Estrogen Plus Progestin and Breast Cancer Incidence and Mortality in the Women's Health Initiative Observational Study. *J Natl Cancer Inst.* Mar 29 2013 (in press).
16. Chlebowski RT, Anderson GL. The influence of time from menopause and mammography on hormone therapy-related breast cancer risk assessment. *J Natl Cancer Inst.* Feb 16 2011;103(4):284-285.
17. Beral V, Reeves G, Bull D, Green J. Breast cancer risk in relation to the interval between menopause and starting hormone therapy. *J Natl Cancer Inst.* Feb 16 2011;103(4):296-305.
18. Chlebowski RT, Anderson GL, Gass M, et al. Estrogen plus progestin and breast cancer incidence and mortality in postmenopausal women. *JAMA.* Oct 20 2010;304(15):1684-1692.
19. Stefanick ML, Anderson GL, Margolis KL, et al. Effects of conjugated equine estrogens on breast cancer and mammography screening in postmenopausal women with hysterectomy. *JAMA.* Apr 12 2006;295(14):1647-1657.
20. Anderson GL, Chlebowski RT, Aragaki AK, et al. Conjugated equine oestrogen and breast cancer incidence and mortality in postmenopausal women with hysterectomy: extended follow-up of the Women's Health Initiative randomised placebo-controlled trial. *Lancet Oncol.* May 2012;13(5):476-486.
